# Supplementary material for: A strategy of chiral cation coordination to achieve a large luminescence dissymmetry factor in 1D hybrid manganese halides
Source: Royal Society of Chemistry journal article supplement (doi:10.1039/d5sc01615k), 2025-01-01
Supplement: d5sc01615k1.pdf [file d5sc01615k1.pdf]

## Supporting Information

### **A strategy of chiral cation coordination to achieve a large luminescence dissymmetry factor in 1D hybrid manganese halides**

Fei Wang,<sup>abc</sup> Xingjun Li,<sup>\*abc</sup> Tianqi Chen,<sup>abc</sup> Liqing Wang,<sup>ac</sup> Chenliang Li,<sup>ac</sup> Wei Zhang,<sup>ac</sup> Wen Yuan,<sup>abc</sup> Shan Lu,<sup>abc</sup> Lina Li,<sup>abc</sup> and Xueyuan Chen<sup>abc</sup>

<sup>a</sup>State Key Laboratory of Structural Chemistry, and Fujian Key Laboratory of Nanomaterials, Fujian Institute of Research on the Structure of Matter, Chinese Academy of Sciences, Fuzhou, Fujian 350002, China.

<sup>b</sup>College of Chemistry and Materials Science, Fujian Normal University, Fuzhou, Fujian 350117, China.

<sup>c</sup>Fujian College, University of Chinese Academy of Sciences, Fuzhou, Fujian 350116, China.

\* Corresponding author, E-mail: [lixj@fjirsm.ac.cn](mailto:lixj@fjirsm.ac.cn)

## 1. Materials and Instrumentation

### Materials

Manganese acetate ( $\text{Mn}(\text{CH}_3\text{COO})_2$ , 99%), (1*R*, 2*R*)-2-aminocyclohexanol (*RR*-DACA, 98%), (1*S*, 2*S*)-2-aminocyclohexanol (*SS*-DACA, 98%), hydrobromic acid (HBr, 48%) were purchased from Aladdin (Shanghai, China). Diethyl ether ( $\text{C}_4\text{H}_{10}\text{O}$ , 98%) was sourced from Sinopharm Chemical Reagent Co., Ltd. All reagents were employed as received without post-synthesis treatment.

### Instrumentation

Single-crystal X-ray diffraction (SCXRD) data of *R/S*-DACAMnBr<sub>3</sub> were collected using Bruker D8 Advance equipped with Mo-K $\alpha$  ( $\lambda = 0.71073 \text{ \AA}$ ) radiation at 100 K. Powder X-ray diffraction (PXRD) patterns were conducted on an X-ray diffractometer (MiniFlex 600, Rigaku) with Cu K $\alpha$ 1 radiation ( $\lambda = 1.54187 \text{ \AA}$ ). X-ray photoelectron spectra (XPS) were performed on a Thermo Fisher ESCALAB 250 Xi X-ray photoelectron spectroscopy with Al K $\alpha$  (15 kV, 20 mA) as the sources of radiation. Fourier transform infrared (FT-IR) spectra were measured in a Magna 750 FTIR spectrometer from samples in KBr pellets. Thermogravimetric analysis (TGA) was tested on a thermal analysis system (STA449-F5 Jupiter, Netzsch, Germany) under a N<sub>2</sub> flow with a heating rate of 10 °C min<sup>-1</sup>. The ultraviolet-visible (UV-Vis) absorption spectra were detected by the spectrometer PerkinElmer Lambda 950. Photoluminescence excitation (PLE) and photoluminescence (PL) emission spectra, PL decays, absolute PL quantum yields (PLQY), and low-temperature measurements were measured on the FLS980 spectrometer (Edinburgh) equipped with both a continuous (450 W), pulsed flash lamp, an OPO nanosecond pulsed laser and a THMS 600 temperature-variable stage. PL photos were taken by an iPhone 14 cell phone without any filter. The CPL spectra of the samples were measured on a JASCO CPL-300 spectrometer ( $\lambda_{\text{ex}} = 357 \text{ nm}$ ) and the collection wavelength was around 626 nm. The circular dichroism (CD) spectra were collected on a J-1500 CD spectrometer with a KBr pellet as a background. The electron paramagnetic resonance (EPR) spectrum was collected on a JES-FA200 spectrometer (HITACHI) at room temperature.

The crystallographic data supporting this paper can be obtained for free from the Cambridge Crystallographic Data Centre (CCDC) under the accession numbers 2378510 and 2378511 at [https://www.ccdc.cam.ac.uk/data\\_request/cif](https://www.ccdc.cam.ac.uk/data_request/cif).

## 2. Experimental Procedures

### Synthesis of *R/S*-DACAMnBr<sub>3</sub> crystals

*R*-DACAMnBr<sub>3</sub> crystals were synthesized via supersaturated recrystallization. Typically, a homogeneous solution was obtained by dissolving 3 mmol Mn(CH<sub>3</sub>COO)<sub>2</sub> in 3 mL HBr within a 50 mL flask, followed by constant stirring at 125 °C for 60 min under ambient conditions. Subsequently, 3 mmol of *RR/SS*-DACA was added to the mixed solution under continuous stirring for 60 min. Light pink crystals of *R*-DACAMnBr<sub>3</sub> were produced by gradual cooling to RT naturally. Finally, the crystals were washed five times with diethyl ether and dried at 75 °C for 1h. The *S*-DACAMnBr<sub>3</sub> crystals were prepared via the same synthetic procedure of *R*-DACAMnBr<sub>3</sub> crystals, except that *RR*-DACA was replaced by *SS*-DACA.

### Fabrication and measurements of CP-LEDs

CP-LEDs were constructed by coupling *R/S*-DACAMnBr<sub>3</sub> crystals to a commercially available ultraviolet (UV) chip ( $\lambda_{\text{em}} = 365 \text{ nm}$ , 3 V). *R/S*-DACAMnBr<sub>3</sub> powders were homogeneously blended with UV-curable adhesive and subsequently applied onto the chip surface. The encapsulated devices were further cured under 365 nm UV light for 15 min, and assembled into a portable lamp colorimeter system for operational configuration. The spectral emission profiles and optoelectronic performance of the CP-LEDs were measured by using a HAAS2000 spectroradiometer equipped with a temperature-regulated integrating sphere apparatus.

### Fabrication and measurements of photodetectors

Photoelectric measurements were performed with planar electrodes. Two symmetric Ag electrodes were deposited on the both ends of a single *R/S*-DACAMnBr<sub>3</sub> crystal, and the channel between neighboring electrodes has areas of 0.01 cm<sup>2</sup>. The current-voltage (*I*-*V*) and current-time curves (*I*-*t*) were measured by using a high-precision electrometer (Keithley 6517B).

**Table S1.** Crystal structure parameters of *R/S*-DACAMnBr<sub>3</sub>.

| Name                                                         | <i>R</i> -DACAMnBr <sub>3</sub>                                              | <i>S</i> -DACAMnBr <sub>3</sub>                                              |
|--------------------------------------------------------------|------------------------------------------------------------------------------|------------------------------------------------------------------------------|
| Identification code                                          | <i>R</i> -DACAMnBr <sub>3</sub> _auto                                        | <i>S</i> -DACAMnBr <sub>3</sub> _auto                                        |
| Empirical formula                                            | C <sub>6</sub> H <sub>14</sub> NOMnBr <sub>3</sub>                           | C <sub>6</sub> H <sub>14</sub> NOMnBr <sub>3</sub>                           |
| Formula weight                                               | 410.85                                                                       | 410.85                                                                       |
| Temperature/K                                                | 99.99(10)                                                                    | 100.00(10)                                                                   |
| Crystal system                                               | orthorhombic                                                                 | orthorhombic                                                                 |
| Space group                                                  | <i>P</i> 2 <sub>1</sub> 2 <sub>1</sub> 2 <sub>1</sub>                        | <i>P</i> 2 <sub>1</sub> 2 <sub>1</sub> 2 <sub>1</sub>                        |
| <i>a</i> /Å                                                  | 7.7707(3)                                                                    | 7.7824(4)                                                                    |
| <i>b</i> /Å                                                  | 8.0410(3)                                                                    | 8.0325(4)                                                                    |
| <i>c</i> /Å                                                  | 19.5459(7)                                                                   | 19.5413(8)                                                                   |
| $\alpha$ /°                                                  | 90                                                                           | 90                                                                           |
| $\beta$ /°                                                   | 90                                                                           | 90                                                                           |
| $\gamma$ /°                                                  | 90                                                                           | 90                                                                           |
| Volume/Å <sup>3</sup>                                        | 1221.31(11)                                                                  | 1221.57(10)                                                                  |
| <i>Z</i>                                                     | 4                                                                            | 4                                                                            |
| $\rho_{\text{calc}}$ g/cm <sup>3</sup>                       | 2.234                                                                        | 2.234                                                                        |
| $\mu$ /mm <sup>-1</sup>                                      | 10.857                                                                       | 10.855                                                                       |
| <i>F</i> (000)                                               | 780.0                                                                        | 780.0                                                                        |
| Crystal size/mm <sup>3</sup>                                 | 0.15 × 0.45 × 0.10                                                           | 0.15 × 0.45 × 0.10                                                           |
| Radiation                                                    | Mo K $\alpha$ ( $\lambda$ = 0.71073)                                         | Mo K $\alpha$ ( $\lambda$ = 0.71073)                                         |
| 2 $\theta$ range for data collection/°                       | 4.168 to 61.458                                                              | 4.168 to 61.306                                                              |
| Index ranges                                                 | -9 ≤ <i>h</i> ≤ 10, -11 ≤ <i>k</i> ≤ 9, -25 ≤ <i>l</i> ≤ 28                  | -8 ≤ <i>h</i> ≤ 11, -10 ≤ <i>k</i> ≤ 7, -26 ≤ <i>l</i> ≤ 20                  |
| Reflections collected                                        | 7462                                                                         | 6217                                                                         |
| Independent reflections                                      | 2989 [ <i>R</i> <sub>int</sub> = 0.0239, <i>R</i> <sub>sigma</sub> = 0.0346] | 2775 [ <i>R</i> <sub>int</sub> = 0.0367, <i>R</i> <sub>sigma</sub> = 0.0510] |
| Data/restraints/parameters                                   | 2989/3/114                                                                   | 2775/0/114                                                                   |
| Goodness-of-fit on <i>F</i> <sup>2</sup>                     | 1.002                                                                        | 1.045                                                                        |
| Final <i>R</i> indexes [ <i>I</i> ≥ 2 $\sigma$ ( <i>I</i> )] | <i>R</i> <sub>1</sub> = 0.0215, <i>wR</i> <sub>2</sub> = 0.0401              | <i>R</i> <sub>1</sub> = 0.0329, <i>wR</i> <sub>2</sub> = 0.0711              |
| Final <i>R</i> indexes [all data]                            | <i>R</i> <sub>1</sub> = 0.0275, <i>wR</i> <sub>2</sub> = 0.0410              | <i>R</i> <sub>1</sub> = 0.0394, <i>wR</i> <sub>2</sub> = 0.0737              |
| Flack parameter                                              | -0.010(9)                                                                    | 0.013(12)                                                                    |
| CCDC                                                         | 2378510                                                                      | 2378511                                                                      |

$$R_1 = \sum ||F_o| - |F_c|| / \sum |F_o|, wR_2 = [\sum w(F_o^2 - F_c^2)^2 / \sum w(F_o^2)^2]^{1/2}$$

**Table S2.** Bond lengths (Å) of *R*-DACAMnBr<sub>3</sub>.

| Bond lengths (Å)     |           |       |          |
|----------------------|-----------|-------|----------|
| Br1-Mn1 <sup>1</sup> | 2.6963(7) | N1-C2 | 1.505(5) |
| Br1-Mn1              | 2.7031(7) | C2-C1 | 1.522(5) |
| Br2-Mn1              | 2.7112(7) | C2-C3 | 1.524(5) |
| Br2-Mn1 <sup>1</sup> | 2.7076(7) | C1-C6 | 1.513(6) |
| Br3-Mn1              | 2.6708(7) | C5-C4 | 1.526(6) |
| Mn1-O1               | 2.218(3)  | C5-C6 | 1.533(6) |
| O1-C1                | 1.452(4)  | C4-C3 | 1.530(6) |

**Table S3.** Bond lengths (Å) of *S*-DACAMnBr<sub>3</sub>.

| Bond lengths (Å)      |            |       |           |
|-----------------------|------------|-------|-----------|
| Br01-Mn1              | 2.6993(13) | C1-C2 | 1.501(11) |
| Br01-Mn1 <sup>1</sup> | 2.7040(12) | C1-C6 | 1.524(9)  |
| Br02-Mn1 <sup>2</sup> | 2.7092(13) | C4-C5 | 1.512(13) |
| Br02-Mn1              | 2.7089(13) | C4-C3 | 1.535(10) |
| Br03-Mn1              | 2.6691(13) | N1-C2 | 1.522(8)  |
| Mn1-O1                | 2.223(5)   | C5-C6 | 1.541(9)  |
| O1-C1                 | 1.453(7)   | C2-C3 | 1.524(9)  |

**Table S4.** Bond angles (°) of *R*-DACAMnBr<sub>3</sub>.

| Bond angles (°)                        |            |                         |           |
|----------------------------------------|------------|-------------------------|-----------|
| Mn1 <sup>1</sup> -Br1-Mn1              | 92.493(12) | O1-Mn1-Br2              | 86.56(7)  |
| Mn1 <sup>1</sup> -Br2-Mn1              | 92.068(12) | O1-Mn1-Br2 <sup>2</sup> | 86.08(7)  |
| Br1 <sup>2</sup> -Mn1-Br1              | 172.80(3)  | O1-Mn1-Br3              | 176.33(7) |
| Br1 <sup>2</sup> -Mn1-Br2              | 91.59(2)   | C1-O1-Mn1               | 129.7(2)  |
| Br1-Mn1-Br2 <sup>2</sup>               | 94.61(2)   | N1-C2-C1                | 107.1(3)  |
| Br1-Mn1-Br2                            | 86.35(2)   | N1-C2-C3                | 109.9(3)  |
| Br2 <sup>2</sup> -Mn1-Br2 <sup>2</sup> | 86.56(2)   | C1-C2-C3                | 111.8(3)  |
| Br2 <sup>2</sup> -Mn1-Br2              | 172.56(3)  | O1-C1-C2                | 108.3(3)  |
| Br3-Mn1-Br1                            | 91.69(2)   | O1-C1-C6                | 112.1(3)  |
| Br3-Mn1-Br1 <sup>2</sup>               | 95.42(2)   | O6-C1-C2                | 112.1(3)  |
| Br3-Mn1-Br2                            | 97.09(2)   | C4-C5-C6                | 110.4(4)  |
| Br3-Mn1-Br2 <sup>2</sup>               | 90.26(2)   | C5-C4-C3                | 110.5(4)  |
| O1-Mn1-Br1 <sup>2</sup>                | 84.15(7)   | C1-C6-C5                | 110.1(3)  |
| O1-Mn1-Br1                             | 88.84(7)   | C2-C3-C4                | 110.2(4)  |

**Table S5.** Bond angles (°) of *S*-DACAMnBr<sub>3</sub>.

| Bond angles (°)                          |            |                          |            |
|------------------------------------------|------------|--------------------------|------------|
| Mn1-Br01-Mn1 <sup>1</sup>                | 92.577(19) | O1-Mn1-Br02              | 86.74(13)  |
| Mn1-Br02-Mn1 <sup>2</sup>                | 92.25(2)   | O1-Mn1-Br02 <sup>1</sup> | 85.95(13)  |
| Br01-Mn1-Br01 <sup>2</sup>               | 172.87(5)  | O1-Mn1-Br03              | 176.25(14) |
| Br01-Mn1-Br02                            | 91.77(4)   | C1-O1-Mn1                | 129.3(4)   |
| Br01-Mn1-Br02 <sup>1</sup>               | 86.38(4)   | O1-C1-C2                 | 108.6(6)   |
| Br01 <sup>2</sup> -Mn1-Br02              | 86.29(4)   | O1-C1-C6                 | 111.3(5)   |
| Br01 <sup>2</sup> -Mn1-Br02 <sup>1</sup> | 94.68(4)   | C2-C1-C6                 | 112.1(6)   |
| Br02-Mn1-Br02 <sup>1</sup>               | 172.61(5)  | C5-C4-C3                 | 110.9(6)   |
| Br03-Mn1-Br1 <sup>2</sup>                | 91.62(4)   | C4-C5-C6                 | 111.1(6)   |
| Br03-Mn1-Br01                            | 95.43(4)   | C1-C2-N1                 | 107.6(6)   |
| Br03-Mn1-Br02 <sup>1</sup>               | 90.32(4)   | C1-C2-C3                 | 112.6(6)   |
| Br03-Mn1-Br02                            | 96.98(4)   | N1-C2-C3                 | 109.2(6)   |
| O1-Mn1-Br01                              | 83.99(12)  | C1-C6-C5                 | 109.7(6)   |
| O1-Mn1-Br01 <sup>2</sup>                 | 89.05(12)  | C2-C3-C4                 | 110.0(6)   |

**Table S6.** Radiative rate constants ( $k_r$ ) and non-radiative rate constants ( $k_{nr}$ ) of *R/S*-DACAMnBr<sub>3</sub> at RT.

| Sample                          | PLQY (%) | $\tau_{\text{eff}}$ (ms) | $\tau_r$ (ms) | $k_r$ (s <sup>-1</sup> ) | $k_{nr}$ (s <sup>-1</sup> ) |
|---------------------------------|----------|--------------------------|---------------|--------------------------|-----------------------------|
| <i>R</i> -DACAMnBr <sub>3</sub> | 32.2     | 0.98                     | 3.04          | $3.29 \times 10^2$       | $6.92 \times 10^2$          |
| <i>S</i> -DACAMnBr <sub>3</sub> | 18.7     | 0.72                     | 3.85          | $2.26 \times 10^2$       | $1.13 \times 10^3$          |

Based on the PL lifetimes and PLQYs ( $\Phi$ ) of *R*-DACAMnBr<sub>3</sub> crystals at RT, the  $k_r$  and  $k_{nr}$  values were calculated by using the following equation:<sup>1</sup>

$$\Phi = \frac{k_r}{k_r + k_{nr}} = \frac{k_r}{k_{obs}} = \frac{\tau_{obs}}{\tau_r}$$

where  $\tau_{obs}$  and  $\tau_r$  represent the observed and radiative decay times, respectively.

**Table S7.** PLQY, effective PL lifetime ( $\tau_{\text{eff}}$ ), radiative decay time ( $\tau_r$ ), radiative rate constants ( $k_r$ ) and non-radiative rate constants ( $k_{\text{nr}}$ ) of *R*-DACAMnBr<sub>3</sub> crystals at different temperatures (120-300 K).

| Temperature (K) | PLQY (%) | $\tau_{\text{eff}}$ (ms) | $\tau_r$ (ms) | $k_r$ (s <sup>-1</sup> ) | $k_{\text{nr}}$ (s <sup>-1</sup> ) |
|-----------------|----------|--------------------------|---------------|--------------------------|------------------------------------|
| 120             | 32.0     | 1.18                     | 3.69          | $2.71 \times 10^2$       | $5.76 \times 10^2$                 |
| 160             | 31.8     | 1.16                     | 3.65          | $2.74 \times 10^2$       | $5.88 \times 10^2$                 |
| 200             | 31.1     | 1.13                     | 3.63          | $2.75 \times 10^2$       | $6.10 \times 10^2$                 |
| 240             | 32.6     | 1.06                     | 3.25          | $3.08 \times 10^2$       | $6.35 \times 10^2$                 |
| 300             | 31.1     | 0.97                     | 3.12          | $3.21 \times 10^2$       | $7.10 \times 10^2$                 |

**Table S8.** Comparison of CPL performance for chiral Mn-based OIMHs.

|    | CPL Materials                                                                                                                                      | Bonding type      | $\lambda_{em}(nm)$ | $ g_{lum} $           | Ref.      |
|----|----------------------------------------------------------------------------------------------------------------------------------------------------|-------------------|--------------------|-----------------------|-----------|
| 1  | <i>R/S</i> -TBM polycrystalline                                                                                                                    | hydrogen bond     | 519                | $2.5 \times 10^{-2}$  | 2         |
| 2  | ( <i>L</i> )-(tert-butyl proline) $MnCl_3$                                                                                                         | hydrogen bond     | 646                | $6.3 \times 10^{-3}$  | 3         |
| 3  | ( <i>R</i> -XH <sup>+</sup> ) <sub>2</sub> MnBr <sub>4</sub> polycrystalline                                                                       | hydrogen bond     | 520                | $8.2 \times 10^{-3}$  | 4         |
| 4  | <i>S</i> -(3-methyl piperidine) $MnCl_3$ SC                                                                                                        | hydrogen bond     | 644                | $1.76 \times 10^{-3}$ | 5         |
| 5  | <i>R</i> -(3-hydroxy piperidine) $MnCl_3$ SC                                                                                                       | hydrogen bond     | 640                | $2.50 \times 10^{-3}$ | 5         |
| 6  | ( <i>R/S</i> -3-C <sub>4</sub> H <sub>12</sub> N <sub>2</sub> ) <sub>6</sub> (Mn <sub>3</sub> Cl <sub>12</sub> ) (Cl) <sub>6</sub> polycrystalline | hydrogen bond     | 630                | $7.1 \times 10^{-3}$  | 6         |
| 7  | <i>S</i> -[MBA-Me <sub>3</sub> ] MnBr <sub>4</sub> SC                                                                                              | hydrogen bond     | 520                | $4.5 \times 10^{-3}$  | 7         |
| 8  | ( <i>R</i> -1-PPA) <sub>2</sub> MnBr <sub>4</sub> film                                                                                             | hydrogen bond     | 510                | 0.01                  | 8         |
| 9  | <i>S</i> -O-H <sub>2</sub> O polycrystalline                                                                                                       | hydrogen bond     | 540                | $1.23 \times 10^{-2}$ | 9         |
| 10 | <i>R/S</i> -MnBr <sub>3</sub>                                                                                                                      | hydrogen bond     | 630                | $6.1 \times 10^{-3}$  | 10        |
| 11 | <i>R</i> -MPEA <sub>2</sub> MnCl <sub>4</sub>                                                                                                      | hydrogen bond     | 630                | 0.01                  | 11        |
| 12 | [H <sub>2</sub> ( <i>RR/SS</i> -BDPP)] MnBr <sub>4</sub> polycrystalline                                                                           | hydrogen bond     | 523                | $2.0 \times 10^{-3}$  | 12        |
| 13 | ( <i>R</i> -Br-MBA) <sub>3</sub> MnBr <sub>5</sub>                                                                                                 | hydrogen bond     | 634                | $9.1 \times 10^{-4}$  | 13        |
| 14 | <i>R</i> -Mn (Binapo)Br <sub>2</sub>                                                                                                               | coordination bond | 633                | $5.1 \times 10^{-3}$  | 14        |
| 15 | ( <i>R/S</i> -MBA) $MnCl_3 \cdot CH_3OH$ polycrystalline                                                                                           | coordination bond | 660                | $1.25 \times 10^{-2}$ | 15        |
| 16 | <i>SS</i> -1 SC                                                                                                                                    | coordination bond | 530                | $2.1 \times 10^{-2}$  | 16        |
| 17 | <i>S</i> -[( <i>L</i> ) <sub>2</sub> MnBr] Br microcrystals                                                                                        | coordination bond | 636                | $1.94 \times 10^{-2}$ | 17        |
| 18 | MnCl <sub>4</sub> -1 film                                                                                                                          | coordination bond | 515                | $5.8 \times 10^{-2}$  | 18        |
| 19 | ( <i>R/S</i> -XH <sup>+</sup> ) MnBr <sub>3</sub> SC                                                                                               | coordination bond | 620                | 0.328                 | 4         |
| 20 | <i>S</i> -DACAMnBr <sub>3</sub> SC                                                                                                                 | coordination bond | 626                | 0.292                 | This work |

**Table S9.**  $g_{\text{lum}}$  values of  $R\text{-DACAMnBr}_3$  upon different rotation angles of the crystals.

| Angle                | $g_{\text{lum}}$ ( $\lambda_{\text{em}} = 626 \text{ nm}$ ) |
|----------------------|-------------------------------------------------------------|
| $R\text{-}0^\circ$   | -0.282                                                      |
| $R\text{-}45^\circ$  | -0.254                                                      |
| $R\text{-}90^\circ$  | -0.246                                                      |
| $R\text{-}135^\circ$ | -0.283                                                      |
| $R\text{-}180^\circ$ | -0.269                                                      |
| $R\text{-}225^\circ$ | -0.248                                                      |
| $R\text{-}270^\circ$ | -0.263                                                      |
| $R\text{-}315^\circ$ | -0.298                                                      |
| $R\text{-}360^\circ$ | -0.293                                                      |
| $S\text{-}0^\circ$   | 0.292                                                       |

**Table S10.**  $g_{\text{lum}}$  values of  $R/S$ -DACAMnBr<sub>3</sub> under a 1.6 T magnetic field.

| Name                           | $g_{\text{lum}}$ ( $\lambda_{\text{em}} = 626 \text{ nm}$ ) |
|--------------------------------|-------------------------------------------------------------|
| $R$ -DACAMnBr <sub>3</sub>     | -0.282                                                      |
| $R$ -DACAMnBr <sub>3</sub> -NS | -0.317                                                      |
| $R$ -DACAMnBr <sub>3</sub> -SN | -0.314                                                      |
| $S$ -DACAMnBr <sub>3</sub>     | 0.292                                                       |
| $S$ -DACAMnBr <sub>3</sub> -NS | 0.317                                                       |
| $S$ -DACAMnBr <sub>3</sub> -SN | 0.321                                                       |

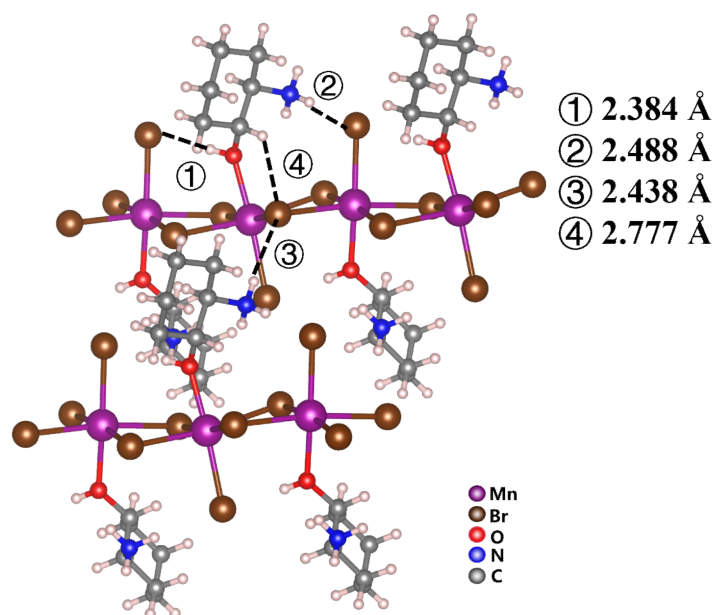

**Figure S1.** Schematic illustration of hydrogen bonds in *R*-DACAMnBr<sub>3</sub>.

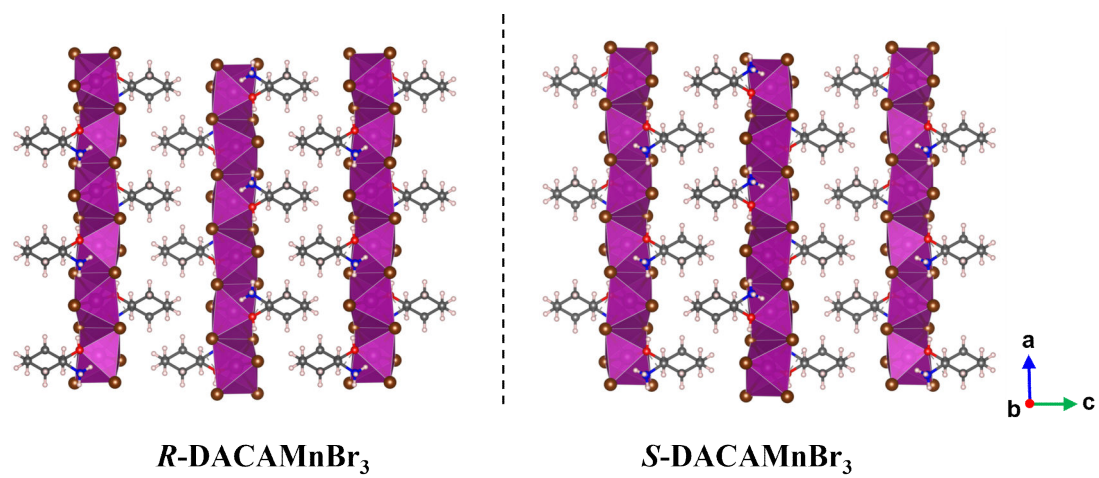

**Figure S2.** Packing diagram in *R/S*-DACAMnBr<sub>3</sub> showing nonsuperimposable mirror images.

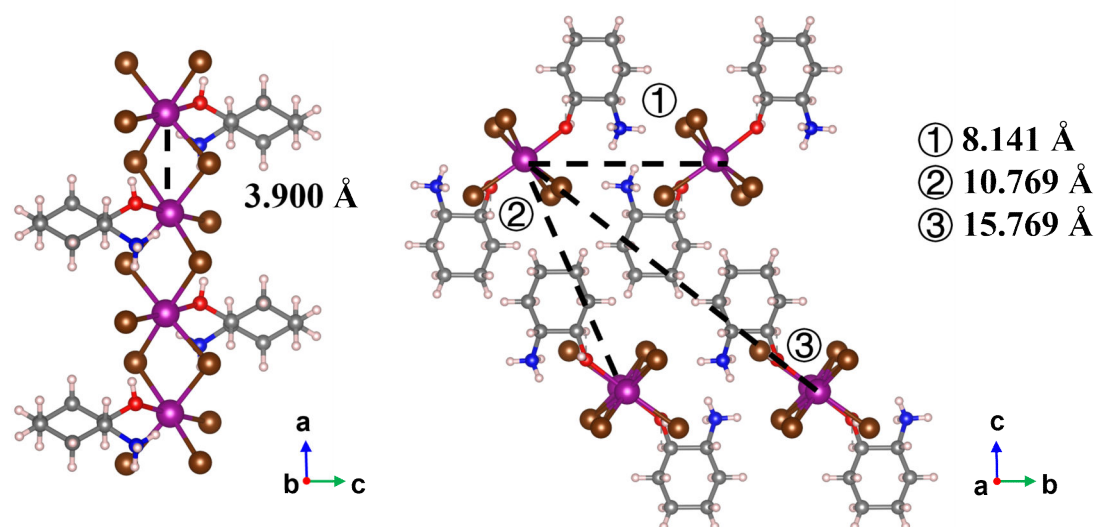

**Figure S3.** Crystal structure diagram showing Mn<sup>2+</sup>-Mn<sup>2+</sup> distance in *R*-DACAMnBr<sub>3</sub>.

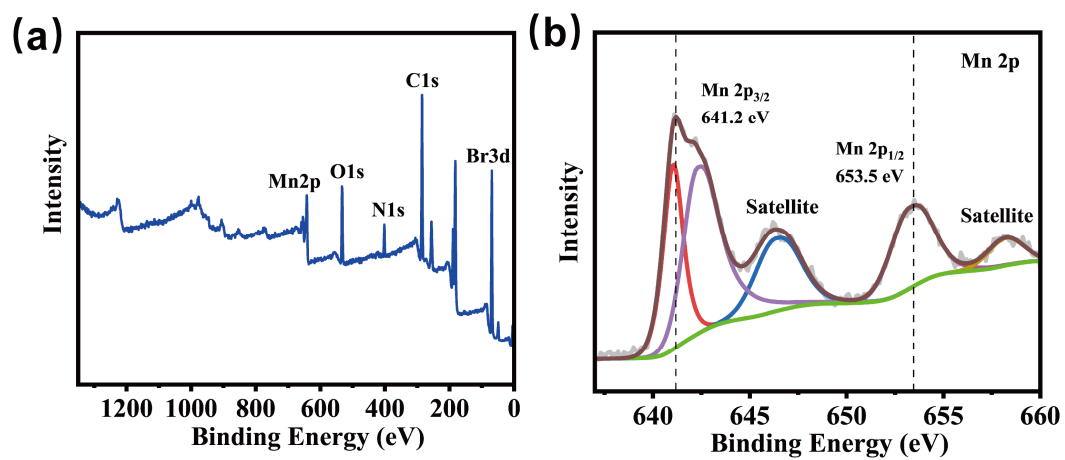

**Figure S4.** (a) XPS of *R*-DACAMnBr<sub>3</sub> crystals. (b) XPS energy region scan typical for Mn 2p.

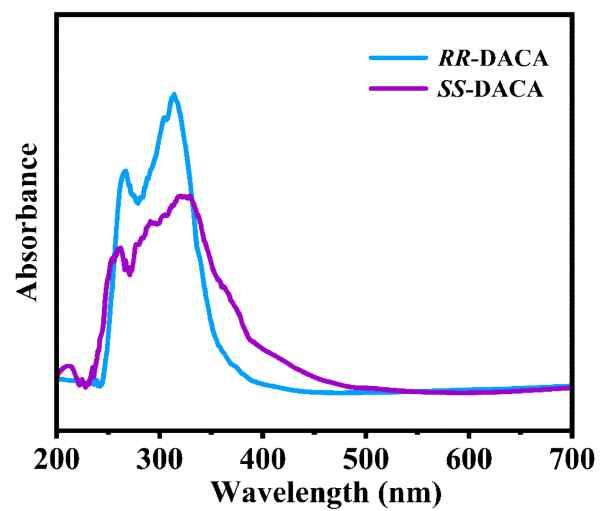

**Figure S5.** UV-vis absorption spectra of *RR*-DACA and *SS*-DACA ligands.

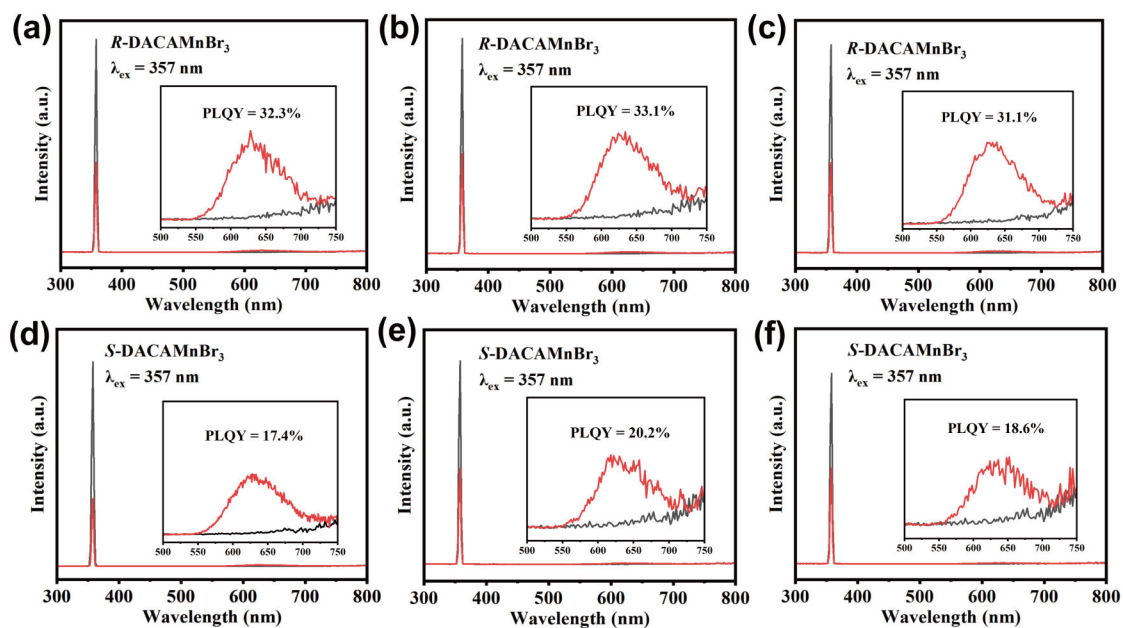

**Figure S6.** Determination of PLQYs for *R/S*-DACAMnBr<sub>3</sub> crystals (a-f). The luminescence spectra were measured independently three times to determine average PLQYs of  $32.2 \pm 0.8\%$  and  $18.7 \pm 1.1\%$  for *R/S*-DACAMnBr<sub>3</sub>, respectively.

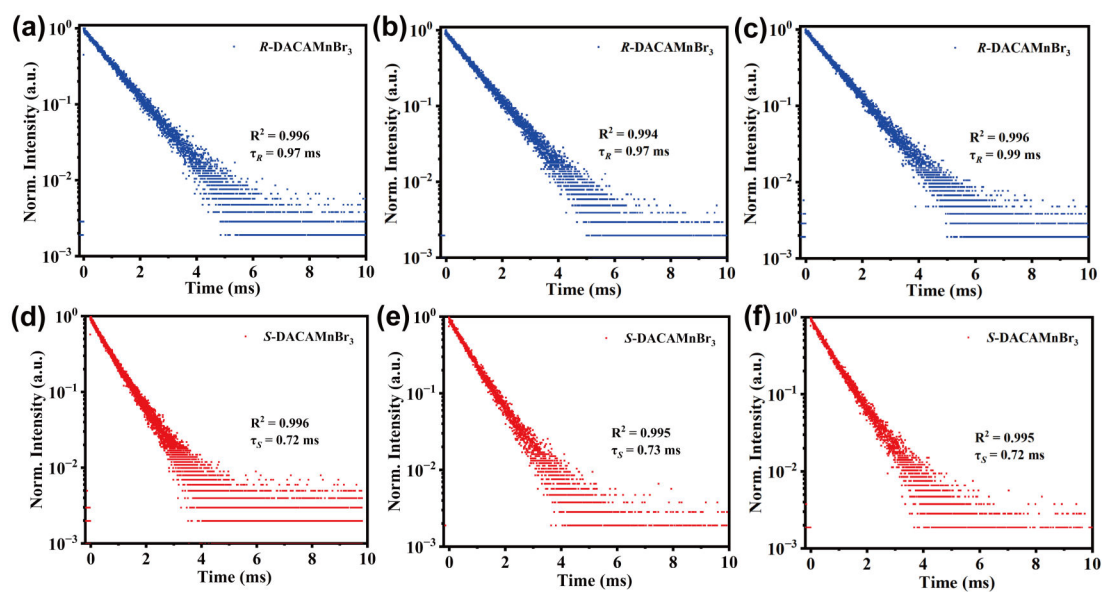

**Figure S7.** PL decay spectra measured from three batches of R-DACAMnBr<sub>3</sub> (a-c) and S-DACAMnBr<sub>3</sub> (d-f) crystals, showing average PL lifetimes of 0.98 and 0.72 ms for R/S-DACAMnBr<sub>3</sub>, respectively.

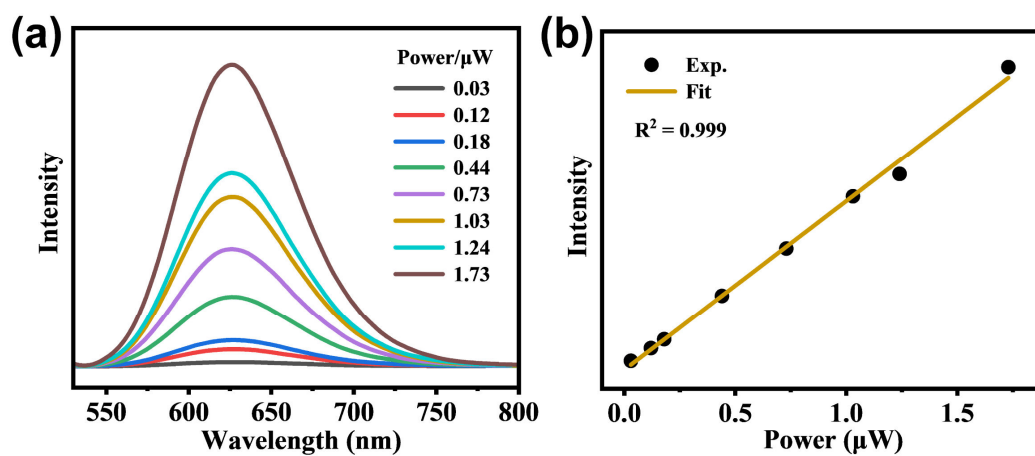

**Figure S8.** (a) Power-dependent PL spectra ( $\lambda_{\text{ex}} = 357 \text{ nm}$ ) of *R*-DACAMnBr<sub>3</sub> crystals. (b) Integrated PL intensities of *R*-DACAMnBr<sub>3</sub> crystals as a function of the excitation powers.

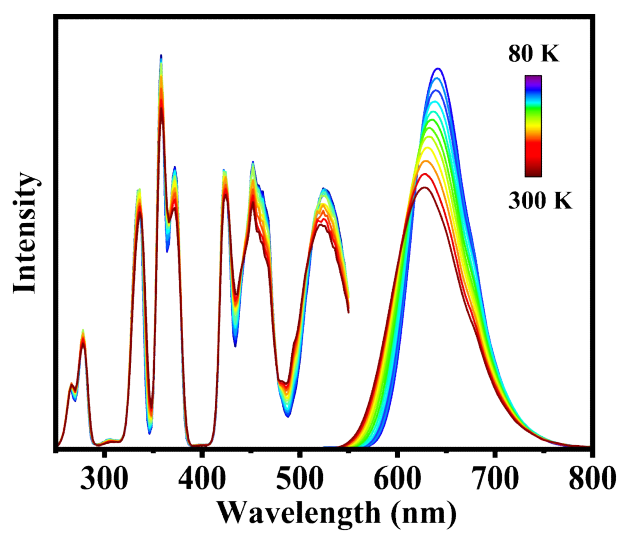

**Figure S9.** Temperature-dependent PL excitation (left,  $\lambda_{\text{em}} = 626$  nm) and emission spectra (right,  $\lambda_{\text{ex}} = 357$  nm) of *R*-DACAMnBr<sub>3</sub> crystals.

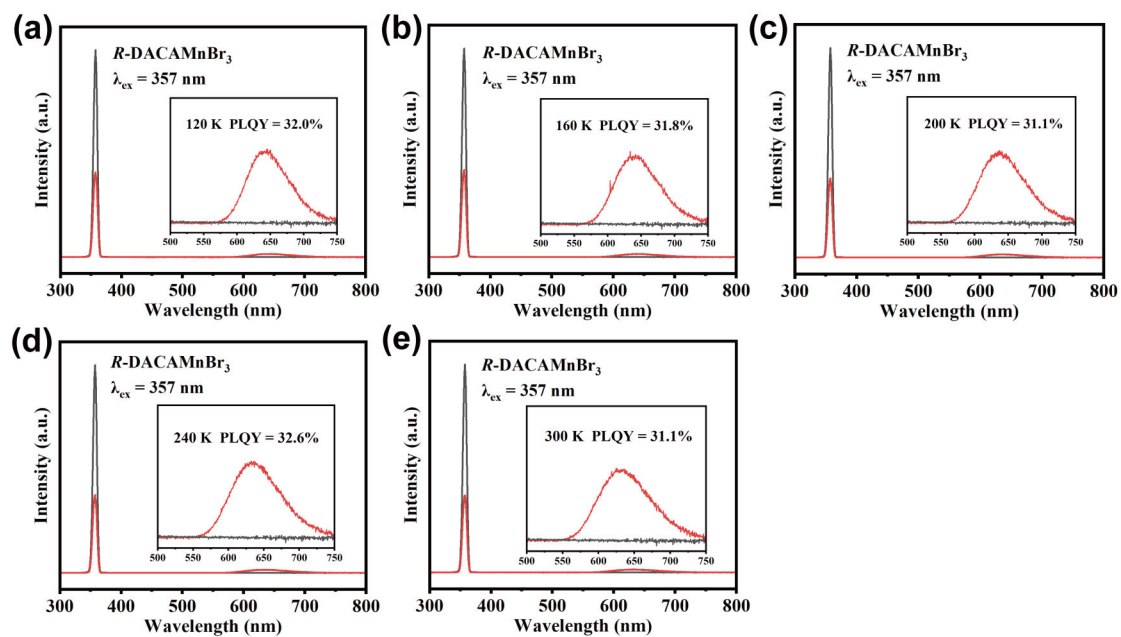

**Figure S10.** Determination of PLQYs for  $R$ -DACAMnBr<sub>3</sub> crystals at different temperatures varying from 120 to 300 K.

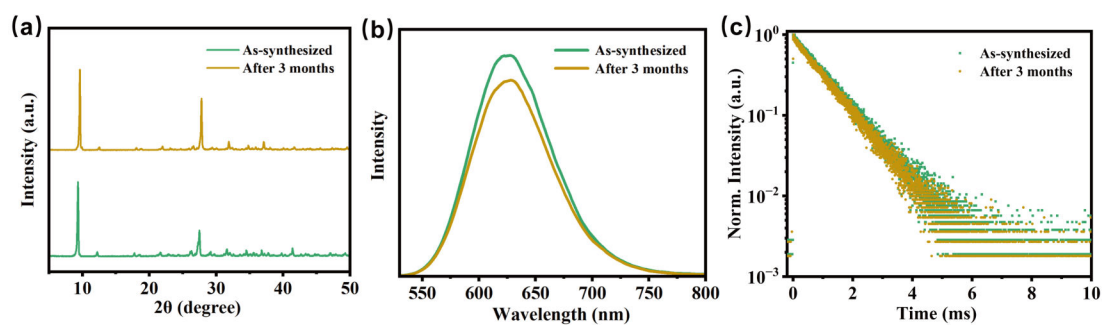

**Figure S11.** (a) Powder XRD patterns, (b) PL emission spectrum and (c) PL decay spectra of *R*-DACAMnBr<sub>3</sub> crystals before and after storing in a desiccator for 3 months. The XRD pattern, PL spectrum and PL lifetime of the stored crystals remained essentially unchanged, confirming the good stability of the crystals in dry air (humidity: <30%).

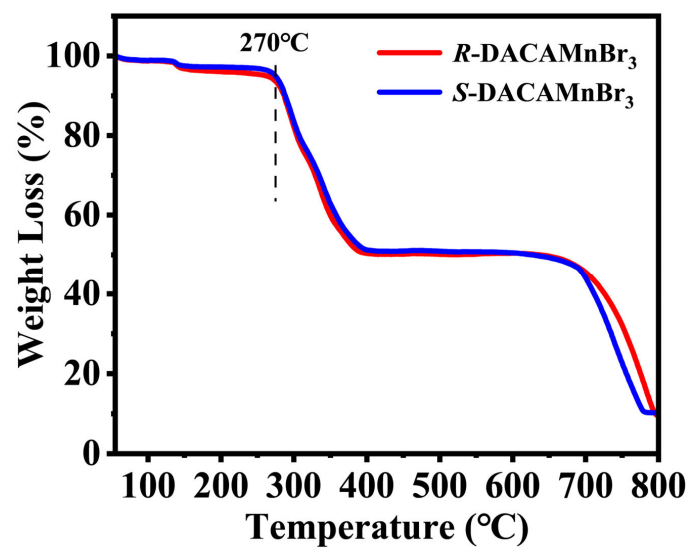

**Figure S12.** Thermogravimetric analysis (TGA) curves for *R/S*-DACAMnBr<sub>3</sub> crystals.

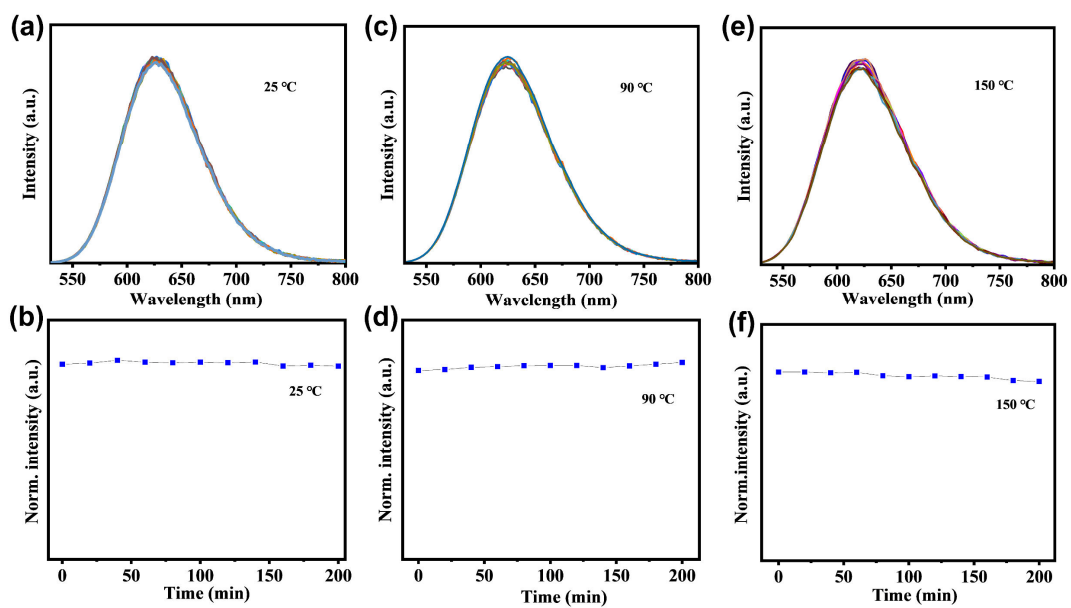

**Figure S13.** Time-dependent PL spectra and integrated PL intensities of *R*-DACAMnBr<sub>3</sub> crystals at (a, b) 25 °C, (c, d) 90 °C, and (e, f) 150 °C, recorded at different time intervals under continuous illumination with a 365 nm UV lamp for 200 min.

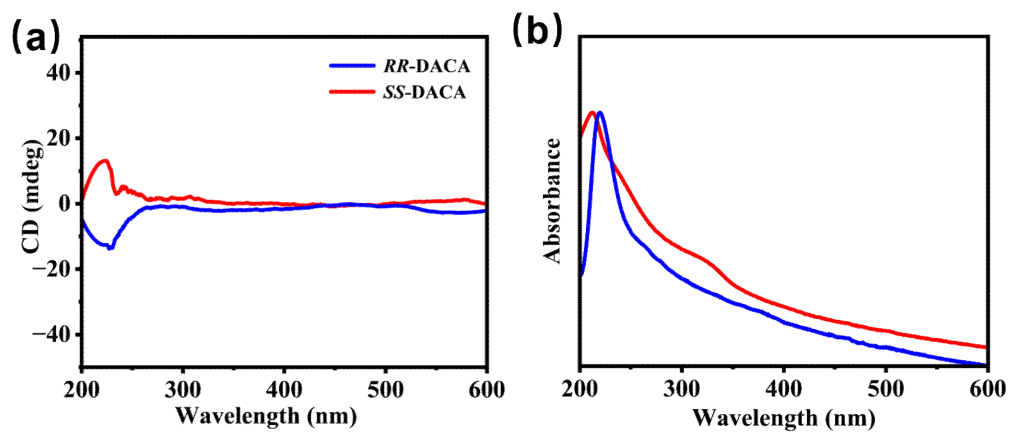

**Figure S14.** (a) CD and (b) UV-vis absorption spectra of SS-DACA and RR-DACA.

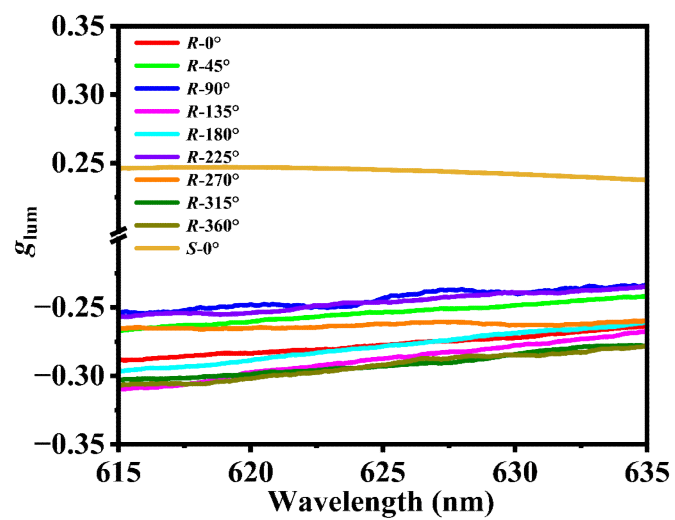

**Figure S15.**  $g_{lum}$  curves of  $R$ -DACAMnBr<sub>3</sub> single crystal with different rotation angles of the crystal.

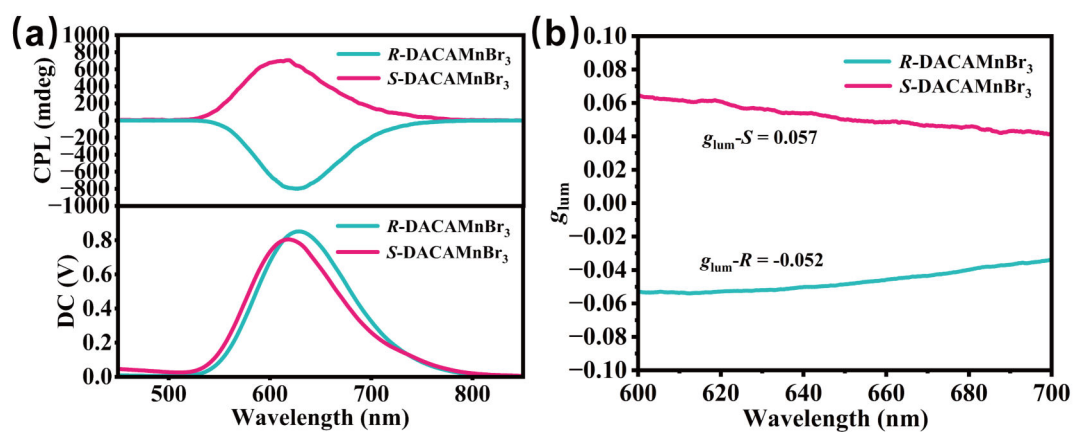

**Figure S16.** (a) CPL spectra and (b)  $g_{lum}$  spectra of polycrystalline  $R/S$ -DACAMnBr<sub>3</sub>.

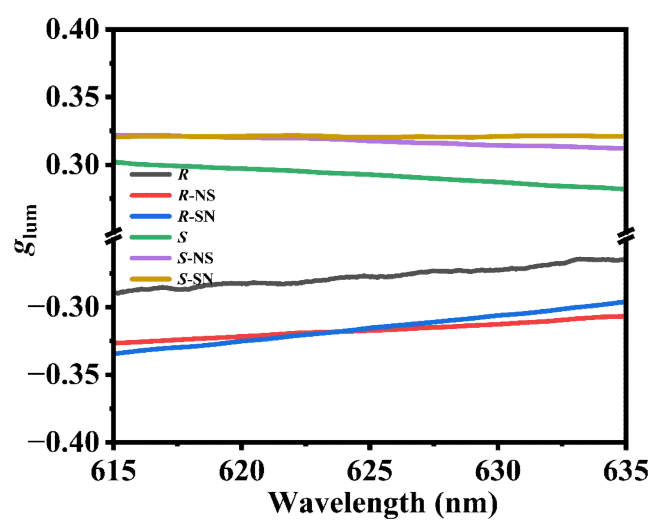

**Figure S17.**  $g_{lum}$  curves of  $R/S$ -DACAMnBr<sub>3</sub> under a 1.6 T magnetic field.

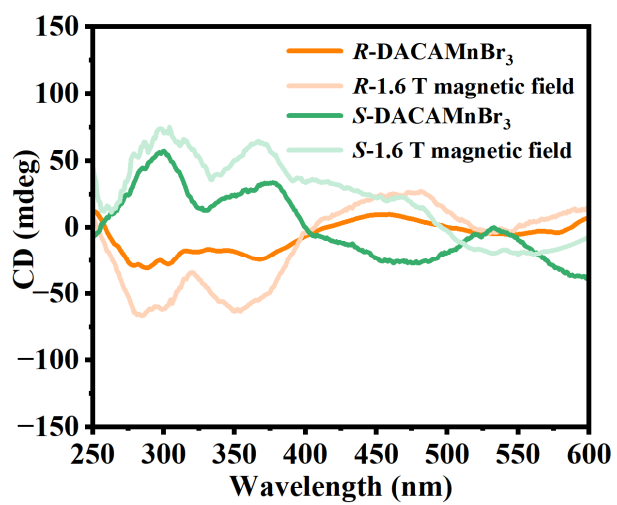

**Figure S18.** CD curves of *R*-DACAMnBr<sub>3</sub> and *S*-DACAMnBr<sub>3</sub> with and without magnetic field (1.6 T).

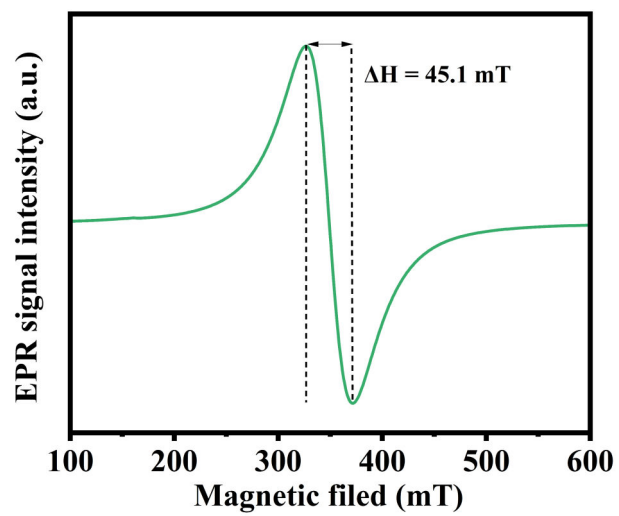

**Figure S19.** EPR spectrum of *R*-DACAMnBr<sub>3</sub> crystals at 298 K.

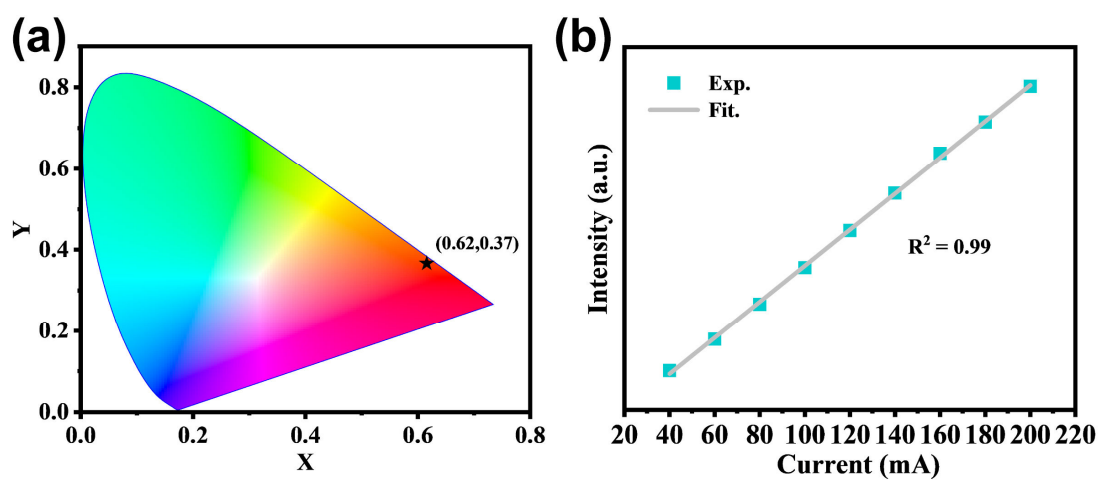

**Figure S20.** (a) CIE 1931 chromaticity color coordinate of *R*-DACAMnBr<sub>3</sub>-based CP-LEDs under 365 nm excitation. (b) Emission intensity versus current linear fitting for *R*-DACAMnBr<sub>3</sub>-based CP-LEDs.

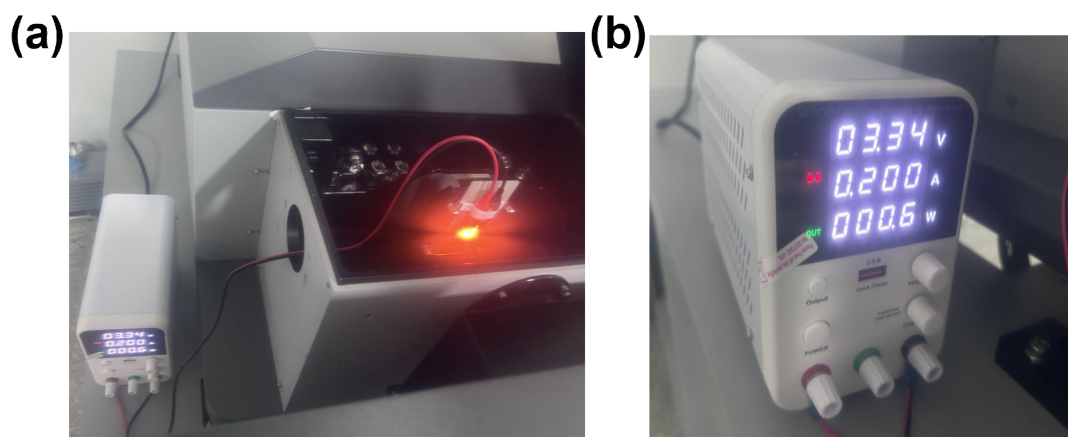

**Figure S21.** (a) Schematic of the CPL test setup for  $R/S$ -DACAMnBr<sub>3</sub>-based CP-LEDs. (b) DC device connection for  $R$ -DACAMnBr<sub>3</sub>-based CP-LEDs.

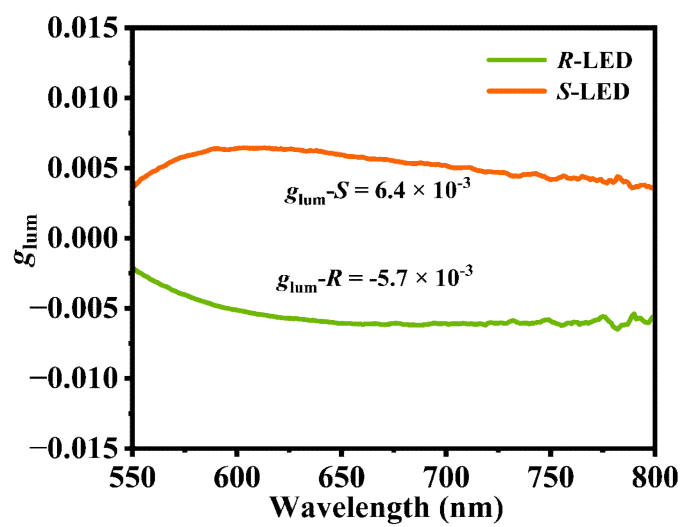

**Figure S22.**  $g_{lum}$  spectra of *R*/*S*-DACAMnBr<sub>3</sub>-based CP-LEDs.

(a)

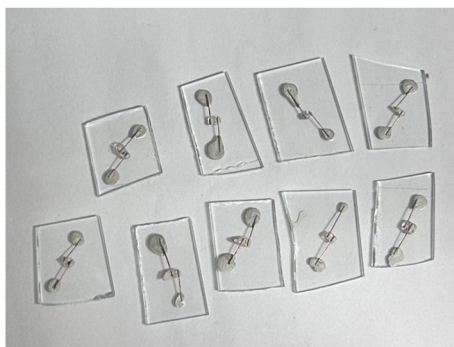

(b)

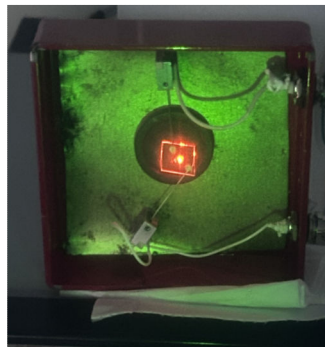

**Figure S23.** (a) Integrated *R*-DACAMnBr<sub>3</sub>-based electrodes for photodetectors. (b) Schematic diagram illustrating the operational mechanism of photoelectric detection in practical applications.

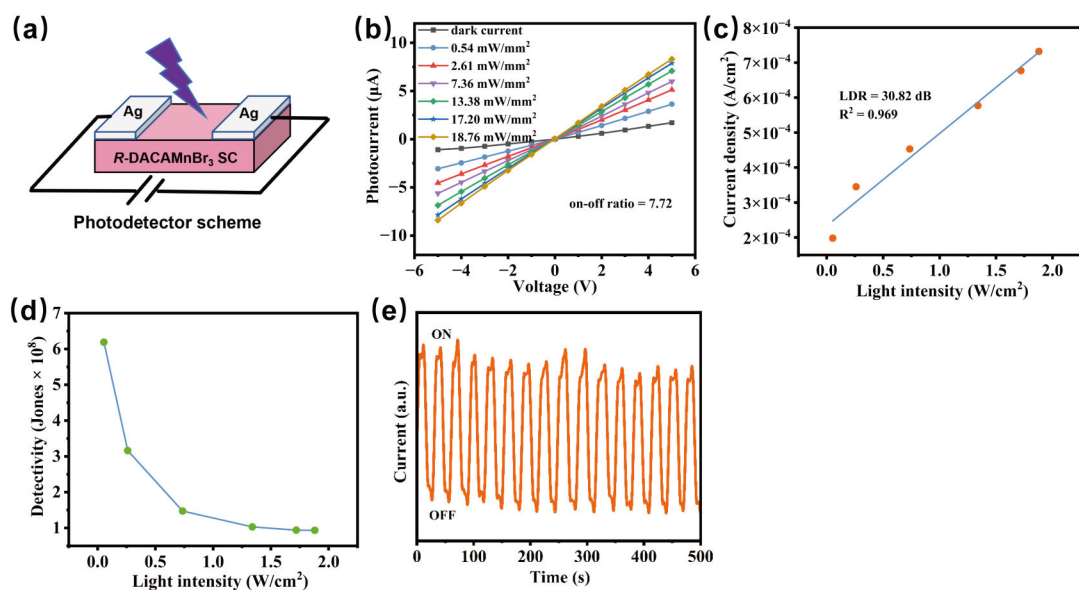

**Figure S24.** (a) Schematic diagram of the photodetector made by  $R\text{-DACAMnBr}_3$  single crystals. (b) I-V characteristics of the photodetector measured under dark and 266 nm laser illumination. (c) Linear dynamic range, (d) specific detectivity and (e) time-dependent reproducible photocurrent on/off switching of  $R\text{-DACAMnBr}_3$ -based photodetector at 266 nm illumination under a 5 V bias.

## References

- 1 K.-L. Wong, J.-C. G. Bunzli and P. A. Tanner, *J. Lumin.*, 2020, **224**, 117256.
- 2 Y. Wu, S. Wang, Z. Lin, L. Kang, J. Wu, Q. Chen and Z. Lin, *Angew. Chem. Int. Ed.*, 2025, **64**, e202416062.
- 3 H.-L. Xuan, Y.-F. Sang, L.-J. Xu, D.-S. Zheng, C.-M. Shi and Z.-N. Chen, *Chem. Eur. J.*, 2022, **28**, e202201299.
- 4 J. Chen, S. Zhang, X. Pan, R. Li, S. Ye, A. K. Cheetham and L. Mao, *Angew. Chem. Int. Ed.*, 2022, **61**, e202205906.
- 5 J. Li, Q. Luo, J. Wei, L. Zhou, P. Chen, B. Luo, Y. Chen, Q. Pang and J. Z. Zhang, *Angew. Chem. Int. Ed.*, 2024, **63**, e202405310.
- 6 M. Wang, X. Wang, B. Zhang, F. Li, H. Meng, S. Liu and Q. Zhao, *J. Mater. Chem. C*, 2023, **11**, 3206-3212.
- 7 M. P. Davydova, L. Meng, M. I. Rakhmanova, I. Y. Bagryanskaya, V. S. Sulyaeva, H. Meng and A. V. Artem'ev, *Adv. Opt. Mater.*, 2023, **11**, 2202811.
- 8 B. Wang, C. Wang, Y. Chu, H. Zhang, M. Sun, H. Wang, S. Wang and G. Zhao, *J. Alloy. Compd.*, 2022, **910**, 164892.
- 9 C. Li, Y. Wei, Y. Li, Z. Luo, Y. Liu, M. He, Y. Zhang, X. He, X. Chang and Z. Quan, *Small*, 2024, **20**, 2400338.
- 10 J.-X. Gao, W.-Y. Zhang, Z.-G. Wu, Y.-X. Zheng and D.-W. Fu, *J. Am. Chem. Soc.*, 2020, **142**, 4756-4761.
- 11 Y. Asensio, H. B. Jalali, S. Marras, M. Gobbi, F. Casanova, A. Mateo-Alonso, F. Di Stasio, I. Rivilla, L. E. Hueso and B. Martin-Garcia, *Adv. Opt. Mater.*, 2024, **12**, 2400554.
- 12 X. He, Y. Zheng, Z. Luo, Y. Wei, Y. Liu, C. Xie, C. Li, D. Peng and Z. Quan, *Adv. Mater.*, 2024, **36**, 2309906.
- 13 T. Zhang, H. Kang, B. Li, J. Zhou, P. Zhao, T. Zhao, X. Li and S. Jiang, *J. Mater. Chem. C*, 2023, **11**, 5461-5468.
- 14 D.-H. Kong, Y. Wu, C.-M. Shi, H. Zeng, L.-J. Xu and Z.-N. Chen, *Chem. Sci.*, 2024, **15**, 16698-16704.
- 15 Z. Song, X. Liu, C. Yang, Q. Wu, X. Guo, G. Liu, Y. Wei, L. Meng and Y. Dang, *Adv. Opt. Mater.*, 2024, **12**, 2301272.
- 16 M. P. P. Davydova, L. Meng, M. I. I. Rakhmanova, Z. Jia, A. S. S. Berezin, I. Y. Bagryanskaya, Q. Lin, H. Meng and A. V. V. Artem'ev, *Adv. Mater.*, 2023, **35**, 2303611.
- 17 Z. Zhou, T. Jiang, Y. Yang, Y. Deng, M. Wang, Y. Ma, S. Liu and Q. Zhao, *Adv. Opt. Mater.*, 2024, **12**, 2302185.
- 18 J. Lu, R.-X. Qian, S.-F. Lu, S.-H. Wang, F.-K. Zheng and G.-C. Guo, *Adv. Funct. Mater.*, 2024, **34**, 2410219.
